# Supplementary material for: Resveratrol Attenuates Neurodegeneration and Improves Neurological Outcomes after Intracerebral Hemorrhage in Mice
Source: PubMed Central journal article supplement (PMC5550718; doi:10.3389/fncel.2017.00228), 2017-08-08
Supplement: Table1.pdf [file Table1.pdf]

**Supplementary Data- Table 1**

|                     | 24 h post-ICH/Sham |      |                   | 72 h post-ICH/Sham |      |                   |
|---------------------|--------------------|------|-------------------|--------------------|------|-------------------|
| <b>Sub-test</b>     | Sham               | ICH  | ICH + Resveratrol | Sham               | ICH  | ICH + Resveratrol |
| Circling            | 0                  | 0.56 | 0.31              | 0                  | 0    | 0                 |
| Compulsory Circling | 0                  | 0.78 | 0.69              | 0                  | 1.7  | 0.56              |
| Beam Walking        | 0.56               | 3.2  | 2.4               | 0.11               | 1.7  | 1.9               |
| Whisker Response    | 0.56               | 3.1  | 1.8               | 0.11               | 1.6  | 0.44              |
| Climbing            | 0.11               | 2.2  | 0.31              | 0                  | 0.11 | 0.11              |
| Bilateral Grasp     | 0.22               | 1.4  | 1                 | 0.11               | 3.1  | 1.1               |
